# Mesodermal Wnt signaling organizes the neural plate via *Meis3*

Yaniv M. Elkouby<sup>1</sup>, Sarah Elias<sup>1</sup>, Elena S. Casey<sup>2</sup>, Shelby A. Blythe<sup>3</sup>, Nir Tsabar<sup>1</sup>, Peter S. Klein<sup>3</sup>, Heather Root<sup>1</sup>, Karen J. Liu<sup>4</sup> and Dale Frank<sup>1,\*</sup>

## SUMMARY

In vertebrates, canonical Wnt signaling controls posterior neural cell lineage specification. Although Wnt signaling to the neural plate is sufficient for posterior identity, the source and timing of this activity remain uncertain. Furthermore, crucial molecular targets of this activity have not been defined. Here, we identify the endogenous Wnt activity and its role in controlling an essential downstream transcription factor, *Meis3*. *Wnt3a* is expressed in a specialized mesodermal domain, the paraxial dorsolateral mesoderm, which signals to overlying neuroectoderm. Loss of zygotic *Wnt3a* in this region does not alter mesoderm cell fates, but blocks *Meis3* expression in the neuroectoderm, triggering the loss of posterior neural fates. Ectopic *Meis3* protein expression is sufficient to rescue this phenotype. Moreover, *Wnt3a* induction of the posterior nervous system requires functional *Meis3* in the neural plate. Using ChIP and promoter analysis, we show that *Meis3* is a direct target of Wnt/ $\beta$ -catenin signaling. This suggests a new model for neural anteroposterior patterning, in which *Wnt3a* from the paraxial mesoderm induces posterior cell fates via direct activation of a crucial transcription factor in the overlying neural plate.

**KEY WORDS:** *Meis3*, *Wnt3a*, Neural patterning, Dorsal-lateral marginal zone (DLMZ), Paraxial mesoderm, *Xenopus*

## INTRODUCTION

Secreted signals act via transcription factors to regulate the anteroposterior (AP) pattern in vertebrate nervous system development. Yet, little is known about how these signaling factors integrate in time and space to specify different cell types. In *Xenopus*, BMP antagonists secreted from the Spemann organizer activate transcription factors to trigger anterior neural induction. A subsequent caudalizing step re-specifies anterior cells to posterior fates of midbrain, hindbrain and spinal cord, which also includes primary neurons and neural crest. Three signaling pathways caudalize neuroectoderm in embryos or explants: retinoic acid (RA), fibroblast growth factors (FGFs) and Wnts (Durst et al., 1989; Sive et al., 1990; Sharpe, 1991; Cox and Hemmati-Brivanlou, 1995; Lamb and Harland, 1995; McGrew et al., 1995; Papalopulu and Kintner, 1996; Holowacz and Sokol, 1999; Fletcher et al., 2006). Integration of these pathways is complicated; different ligands of the same family could act in varying regional and temporal zones to induce cell fates. How these different pathways act in concert to activate transcription factors or subsequent signaling events is still an enigma.

In *Xenopus*, the canonical Wnt signaling pathway is a key regulator of the embryonic neural AP pattern. Activating Wnt/ $\beta$ -catenin signaling in neural tissue induces posterior cell fates (McGrew et al., 1995; Kiecker and Niehrs, 2001), while repressing anterior fates (Glinka et al., 1998). An endogenous inhibitor of this pathway, *Dkk1* is expressed in anterior neural regions, and its

activity is required to maintain this Wnt-free zone (Glinka et al., 1998; Kazanskaya et al., 2000). Ectopic *Dkk1* expression blocks posterior cell fate formation, further supporting a role for Wnt activity in the posterior neural plate (Kazanskaya et al., 2000; Kiecker and Niehrs, 2001). *Wnt3a* is a good candidate for this caudalizing activity; when ectopically expressed, it induces posterior tissue in vivo and in neuralized explants (McGrew et al., 1995; Kiecker and Niehrs, 2001). Initially expressed in dorsal mesodermal regions of gastrulae, *Wnt3a* mRNA becomes localized to the neural plate at early neurula stages (McGrew et al., 1997; Faas and Isaacs, 2009). Accordingly, an endogenous AP gradient of nuclear localized  $\beta$ -catenin was observed in the *Xenopus* neural plate; in *Xenopus* and chick explants, exogenous *Wnt3a* induced posterior-neural-marker expression in a gradient-like manner (Kiecker and Niehrs, 2001; Nordstrom et al., 2002). However, the exact role and timing of endogenous *Wnt3a* activity in neural caudalization has not been rigorously examined.

The temporal and regional locale of the endogenous neural caudalizing signal is still a mystery. Although *Wnt3a* is expressed in the posterior neural plate, onset of expression in neuroectoderm occurs relatively late (McGrew et al., 1997; Faas and Isaacs, 2009). To address this, we hypothesized that the early mesodermal *Wnt3a* expression domain might significantly contribute to patterning overlying neural tissue. In chick and zebrafish embryos, paraxial mesoderm explants were shown to have neural caudalizing capacity (Muhr et al., 1997; Woo and Fraser, 1997), but neither FGF nor RA can substitute for this activity (Nordstrom et al., 2002). The comparable tissue in *Xenopus* is a specialized mesodermal region, the paraxial-fated dorsolateral marginal zone (DLMZ). This region is required to induce neural crest in *Xenopus* (Bonstein et al., 1998). *Wnt3a* is indeed expressed in the DLMZ region of gastrula *Xenopus* and zebrafish embryos (McGrew et al., 1997; Shimizu et al., 2005; Faas and Isaacs, 2009). Thus, this secreted factor may be well positioned to direct transcription factor targets in the overlying neural plate.

<sup>1</sup>Department of Biochemistry, The Rappaport Family Institute for Research in the Medical Sciences, Faculty of Medicine, Technion–Israel Institute of Technology, Haifa 31096, Israel. <sup>2</sup>Department of Biology, Georgetown University, Washington, DC 20057, USA. <sup>3</sup>Cell and Molecular Biology, University of Pennsylvania School of Medicine, Philadelphia, PA 19104-6148, USA. <sup>4</sup>Department of Craniofacial Development, King's College London, London SE1 9RT, UK.

\* Author for correspondence (dale@tx.technion.ac.il)

*Meis3*, a TALE-family homeobox protein, is expressed in the posterior neuroectoderm in mid-late gastrula stages; by neurula stages, expression is fixed in the hindbrain and the anterior spinal cord (Salzberg et al., 1999). We showed that *Meis3* is required for *Xenopus* posterior neural cell fate specification. In the absence of *Meis3* activity, embryos lose numerous posterior neural cell fates, such as of the hindbrain, primary neuron and neural crest, but not the spinal cord; the forebrain is posteriorly expanded; pan-neural marker expression is normal (Dibner et al., 2001; Gutkovich et al., 2010). We also showed that *Meis3* induces posterior neural cell fates non-cell autonomously, perhaps by way of other secreted factors (Aamar and Frank, 2004). In zebrafish embryos, *Meis3* protein was also required for hindbrain formation (Vlachakis et al., 2001; Waskiewicz et al., 2001). Thus, *Meis3* plays a crucial role in the developing posterior neural plate.

*Dkk1* gain-of-function and *Meis3*-morphant phenotypes are very similar (Kazanskaya et al., 2000; Dibner et al., 2001), suggesting an interaction between canonical Wnt signaling and *Meis3* protein. In this study, we show that canonical Wnt signaling is essential for activating *Meis3* gene expression in the neural plate. We show that the *Meis3* gene is a direct target of the canonical Wnt signaling pathway. As determined by chromatin immunoprecipitation (ChIP) analysis,  $\beta$ -catenin protein is bound to the *Meis3* promoter region at the appropriate time. In transgenic frogs, these  $\beta$ -catenin-TCF binding sites are required to drive reporter gene expression in vivo. In addition, *Meis3* is sufficient to direct posterior neural fates in the absence of Wnt signaling. Either *Dkk1* protein overexpression or *Wnt3a* knockdown leads to a loss of posterior neural fates, including of the hindbrain, neural crest and primary neurons; this phenotype is rescued by ectopic *Meis3* expression. Explant and ablation experiments show that the source of the caudalizing signal is localized to the DLMZ region and not to axial mesoderm. Furthermore, we show that *Wnt3a* is required in the DLMZ to activate *Meis3* expression in adjacent neuroectoderm cells. Taken together, our data suggest a new model for neural pattern formation, in which the earliest expression of *Wnt3a* protein in paraxial mesoderm directly activates *Meis3* in the overlying neuroectoderm to induce posterior fates.

## MATERIALS AND METHODS

### *Xenopus* embryos

Ovulation, in vitro fertilization, embryo culture, dissections and explant culture were as described (Re'em-Kalma et al., 1995; Bonstein et al., 1998).

### RNA, DNA and morpholino oligonucleotide (MO) injections

Capped sense in vitro transcribed full-length mRNA, *BMPRIA dominant-negative receptor* (*DNR*), *Meis3* (Salzberg et al., 1999), *Dkk1* (Glinka et al., 1998) and the glucocorticoid-inducible *Tcf3-VPI3* (*THVGR*) (Wu et al., 2005) were injected into embryos at one- or two-cell stages. Mouse *Wnt3* (pCS105) and *Xenopus Wnt3a* (pCS107) plasmids were also injected in zygotic expression assays. MOs used for *Wnt3a* (Gene Tools) were:

translational blocking, GAGCAAATATCCAAAGCAGCCCATC;  
splice blocking, intron-exon, TCTAAGATCGACTGGAAACAAAATG;  
and  
exon-intron, AGAAAAGTAACTTACTGTTCTGCCT.

### Whole-mount in situ hybridization

Whole-mount in situ hybridization was carried out with digoxigenin/fluorescein-labeled probes (Harland, 1991): *XAG1*, *Otx2*, *Krox20*, *HoxB3*, *Meis3* (Dibner et al., 2001), *HoxD1* (Dibner et al., 2004), *N-Tubulin* (*N-Tub*), *Slug*, *FoxD3* (Gutkovich et al., 2010), *muscle actin* (*mAct*) (Keren et al., 2005), *Gbx2* (Kiecker and Niehrs, 2001).  $\beta$ -Galactosidase ( $\beta$ -Gal) was used as a lineage tracer (Dibner et al., 2004), using light blue (X-Gal) or bright pink (Rose D-X-Gal) colored substrates.

### Semi-quantitative (sq) RT-PCR analysis

sqRT-PCR was performed (Snir et al., 2006). Primers: *XHis4*, *Xbra*, *MyoD*, *Krox20*, *HoxB9*, *Otx2*, *XAG1* (Snir et al., 2006), *EF1a*, *Meis3*, *HoxD1*, *FoxD3*, *HoxB3*, *FGF3*, *FGF8* (Gutkovich et al., 2010), *XANF1*, *Xnr3*, *Slug*, *N-Tub*, *mAct*, *NeuroD* (Harland Laboratory database). In all sqRT-PCR experiments performed, multiple numbers of independent experiment repeats were typically performed, as mentioned in the figure legends ( $n=X$ ). In all experiments, each sample was routinely assayed a minimum of two times for each marker.

### CHX explant assay

Embryos at the one-cell stage were injected with *THVGR* mRNA. Animal cap (AC) explants were removed at blastula stages for culture. At mid-late blastula stages, cyclohexamide (CHX, 5  $\mu$ M) was added. After 1.5 hours, dexamethasone (DEX, 1  $\mu$ M) was added at gastrula stages 10–10.25. Explants were cultured until mid-late gastrula and total RNA was isolated for sqRT-PCR analysis.

### ChIP and frog transgenesis

For each immunoprecipitation (IP), 50 late-gastrula stage embryos were fixed and processed according to the ChIP protocol (Blythe et al., 2009) using anti-N-terminal *Xenopus*  $\beta$ -catenin antiserum or normal rabbit serum as a negative control. Samples were analyzed by SYBR-Green QPCR with the *Meis3* (–1813, see Fig. S3 in the supplementary material) and *XMLC2* (–118) primers (Blythe et al., 2009). For cloning *Meis3* genomic sequences, a *X. laevis* BAC library was screened with a DNA probe overlapping the *Meis3* mRNA sequence: 6.5 kb of the BAC was sequenced, which included 3.0 kb upstream to the start of transcription, the 5'UTR, the first exon, and part of the first intron. A 2.7 kb genomic *Meis3* region was amplified using Pfu DNA polymerase and sub-cloned into a pGL-3 basic (promoter-less) *luciferase* (*luc*) reporter vector (Promega). Mutagenesis of the two  $\beta$ -catenin/TCF sites was performed by the Dpn method (Stratagene), ACAAAG was converted to ACGCGT. Transgenesis was performed (Rogers et al., 2008); *luc* gene expression was detected by in situ hybridization.

## RESULTS

### Wnt activity induces *Meis3* expression in vivo and in explants

In *Xenopus* embryos, canonical Wnt signaling and *Meis3* protein activities share similar overlapping features as neural caudalizers. We wanted to determine the connection between canonical Wnt signaling and *Meis3* expression. Two molecular tools were used to determine if zygotic Wnt activity induces *Meis3* expression in embryos or AC explants. We injected RNA encoding a constitutively activated, dexamethasone-inducible TCF protein (*THVGR*) or a CMV-promoter plasmid containing a *Wnt3* (*mWnt3*) cDNA that is expressed only at the onset of zygotic transcription at mid-blastula. Both tools circumvent the early maternal-Wnt gain-of-function phenotype of axis duplication, and consistently activate high expression levels of posterior neural homeobox genes, such as *HoxD1*, *HoxA2* and *Gbx2*, in late gastrula-early neurula embryos and ectodermal AC explants (Fig. 1B). Accordingly, high ectopic levels of *Meis3* mRNA were also induced (Fig. 1A,B). In mid-late neurula stages, using either approach, there was a sharp decrease in anterior marker expression with a concomitant expansion of posterior neural markers of the hindbrain, primary neuron and neural crest (Fig. 3A, not shown).

### Zygotic Wnt activity is required for *Meis3* expression in late-gastrula/early-neurula stage embryos

To determine whether Wnt was required for *Meis3* expression, we depleted canonical Wnt signaling by either ectopic *Dkk1* protein expression or *Wnt3a* morpholino oligonucleotide (MO) injection.

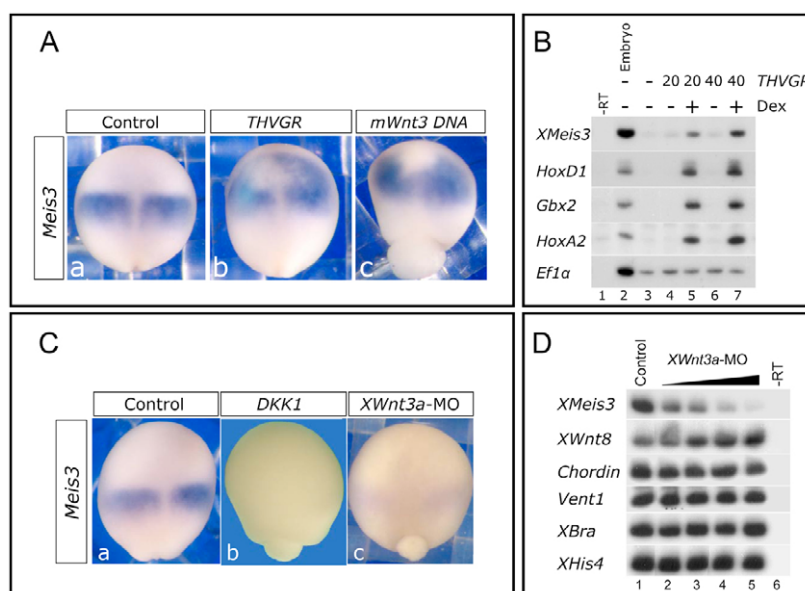

**Fig. 1. The canonical Wnt pathway is necessary and sufficient for activating *Meis3* gene expression.** (A) In situ hybridization of late gastrula/early neurula embryos injected at the one-cell stage with either *THVGR* mRNA (10–20 pg, b) or *mWnt3* DNA (100 pg, c). *THVGR* was activated by 1 μM DEX at the onset of gastrulation. *Meis3* expression is anteriorly expanded in embryos injected with *THVGR* (113/121 embryos) or with *mWnt3* (40/56 embryos). (B) sqRT-PCR of pools of 18 mid-gastrula stage AC explants dissected from embryos injected with *THVGR* mRNA (20, 40 pg) at the one-cell stage. *THVGR* was activated by 1 μM DEX at the onset of gastrulation. *Ef1α* was used as a loading control. No reverse transcriptase (–RT) control PCR was performed on RNA isolated from control embryos in all shown experiments. Posterior markers were not induced in *THVGR* DEX-untreated ACs (lanes 4, 6; *n*=5 experiments). (C) In situ hybridization of late gastrula/early neurula embryos injected at the one-cell stage with either *Dkk1* mRNA (25 pg, b) or *Wnt3a*-MO (30 ng, c). *Meis3* expression is eliminated in *Dkk1* (98/98 embryos) and *Wnt3a*-morphant (37/37 embryos) embryos. (D) sqRT-PCR of pools of ten late-gastrula embryos injected with *Wnt3a*-MO either marginally or anally (10, 20, 40, 80 ng) at the one-cell stage. *XHis4* was used as a loading control. Mesoderm marker expression is unaltered in *Wnt3a*-morphant embryos (*n*=5 experiments).

To validate *Wnt3a* MO specificity, both translation- and splice-blocking MOs were used (see Fig. S1 in the supplementary material). These two MOs synergized when injected at low sub-phenotypic concentrations to induce a characteristic anteriorized phenotype, with neural fold inhibition (see Fig. S1F–G in the supplementary material). In addition, rescue experiments were performed in which the morphant phenotype was rescued by co-expression of a mouse *Wnt3* RNA/DNA instead of a *Xenopus Wnt3a* RNA/DNA (see Fig. S1C–E in the supplementary material). Ectopic *Dkk1* protein expression or *Wnt3a*-MO injection severely inhibited the initial activation of *Meis3* expression in these embryos (Fig. 1C). *Wnt3a*-MO inhibition of *Meis3* expression was dose dependent (Fig. 1D). By contrast, the *Wnt3a*-MO did not alter the expression of a wide panel of mesoderm marker genes, such as the pan-mesodermally expressed *XBra*, the dorsally expressed *chordin* and *gooseoid* (not shown), and the ventrolaterally expressed *Wnt8* and *vent1* genes (Fig. 1D). Consistent with loss of *Meis3* expression, Wnt loss of function prevented the expression of a number of early expressed homeobox genes (*HoxD1*, *Gbx2* and *HoxA2*) that are crucial for determining posterior neural cell fates (Fig. 2C; data not shown). Anterior *Otx2* marker expression was also expanded in *Dkk1*-injected embryos (Fig. 2C). When sibling embryos were cultured to later stages, a typical canonical Wnt loss-of-function phenotype was observed, in which hindbrain, primary neuron and neural crest cell fates were lost with either of the Wnt-inhibitory treatments (Fig. 2A,B). In these same embryos, expression of anterior markers such as *XAG1* or *XANF1* was expanded (Fig. 2A,B). Interestingly, in the spinal cord, *HoxB9* expression levels are typically normal in both *Dkk1*-injected and *Meis3*-morphant

embryos (Dibner et al., 2001), with only occasional minor perturbations of AP expression levels (not shown). The striking similarity of the Wnt and *Meis3* knockdown phenotypes, and the requirement of the Wnts for *Meis3* gene expression, strongly suggested that the *Meis3* protein could be a downstream mediator of the Wnt pathway in specifying posterior neural cell fates of the hindbrain, neural crest and primary neuron lineages, but not the spinal cord.

### Meis3 can restore posterior neural fates in the absence of Wnt

To determine *Meis3*-Wnt epistasis, *Meis3* protein was ectopically co-expressed in embryos injected with either *Dkk1* mRNA or the *Wnt3a*-MO. In these Wnt loss-of-function phenotypes, ectopic *Meis3* protein expression robustly rescued posterior cell fates (Fig. 2A,B). In the *Dkk1* rescue experiments (Fig. 2A), *Dkk1* mRNA was injected at the one-cell stage followed by *Meis3* mRNA injection into one blastomere at the two-cell stage. *Meis3* was co-injected with β-galactosidase (β-gal) mRNA as a lineage tracer (light blue/bright pink stain, depending on the substrate used). Over 94% of the embryos were β-gal positive on the injected side and only these embryos were scored. In these co-injected embryos, expression of hindbrain [*Krox20*, *HoxB3* (not shown)], primary neuron (*N-Tub*) and neural crest [*FoxD3*, *Slug* (not shown)] markers was rescued (Fig. 2A). In *Dkk1* rescued embryos, the somewhat disorganized regional *Krox20* expression in the hindbrain was the typical phenotype (Fig. 2A, parts i,i'). In some cases, gene expression was rescued on both sides of the embryo (*N-Tub*), despite injecting *Meis3* RNA into only one blastomere at the two-cell stage (Fig. 2A, parts



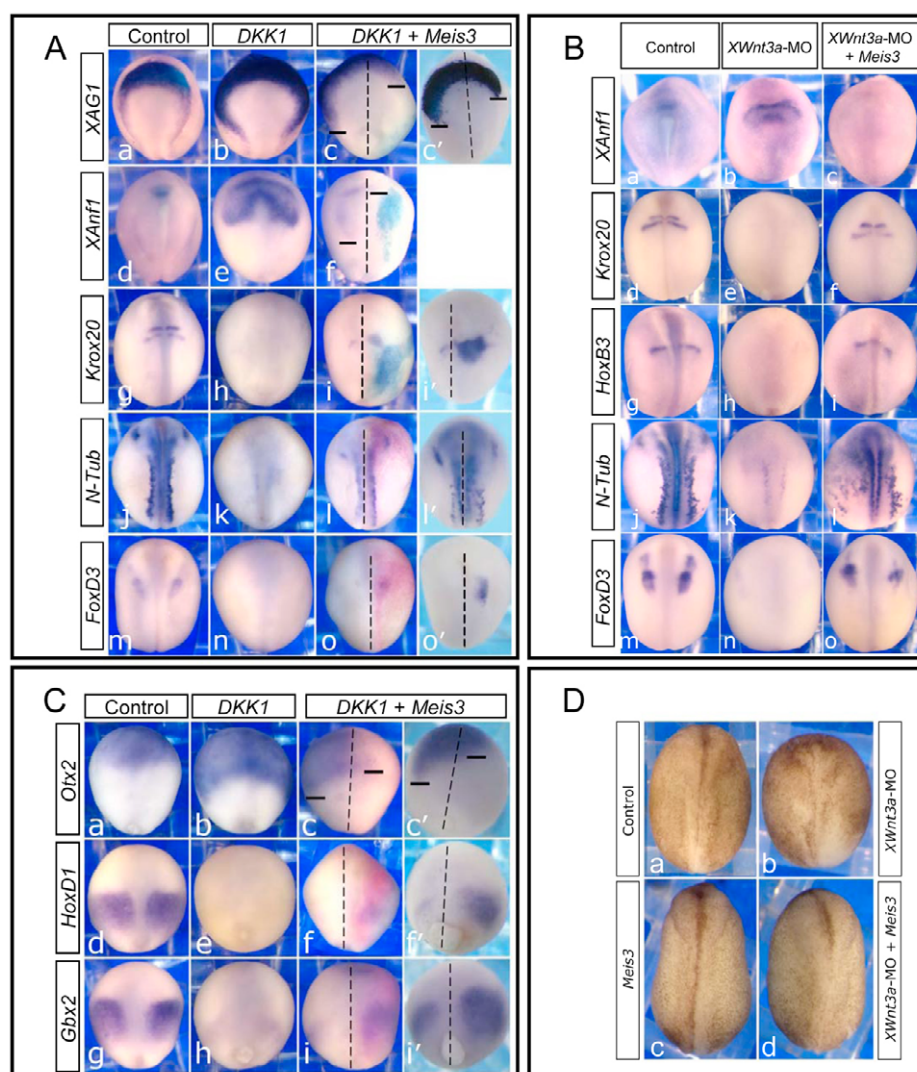

**Fig. 2. Meis3 restores posterior neural cell fates in the absence of canonical Wnt signaling.** (A) In situ hybridization of mid-late neurula embryos injected at the one-cell stage with *Dkk1* mRNA (35 pg; b,e,h,k,n) or, additionally, with *Meis3* (0.25 ng) and  $\beta$ -gal (25 pg) mRNAs into one blastomere at the two-cell stage (c,f,i,l,o). All embryos are viewed dorsally, and oriented with anterior at the top, posterior at the bottom. The *Meis3*-injected side is on the right, as traced by the light blue/bright pink X-Gal staining. Dashed lines indicate the dorsal midline; bars indicate the posterior limits of gene expression on either side of the embryo. c', i', l' and o', show more clearly the signal in embryos treated as in c, i, l and o, respectively, but with no  $\beta$ -gal. *XAG1* and *XAnf1* expression undergoes robust posterior expansion in *Dkk1* embryos (b, 113/115 embryos; e, 30/30 embryos), which is inhibited by *Meis3* co-expression (c,c', 73/81 embryos; f, 32/39 embryos). Posterior neural marker expression, *Krox20*, *N-Tub* and *FoxD3*, is inhibited in *Dkk1* embryos (h, 78/80 embryos; k, 40/41 embryos; n, 51/52 embryos), but is strongly rescued by *Meis3* co-expression (i,i', 90/106 embryos; l,l', 43/62 embryos; o,o', 36/63 embryos). (B) In situ hybridization of mid-late neurula embryos injected at the one-cell stage with either *Wnt3a*-MO (50–60 ng; b,e,h,k,n), or, separately, with both *Wnt3a*-MO (50–60 ng) and *Meis3* mRNA (0.5 ng; c,f,i,l,o). *XAnf1* expression is posteriorly expanded in *Wnt3a*-morphants (b, 31/31 embryos), and suppressed by *Meis3* co-expression (c, 55/55 embryos). Expression of the posterior neural markers *Krox20*, *HoxB3*, *N-Tub* and *FoxD3* is inhibited in *Wnt3a*-morphants (e, 31/33 embryos; h, 31/31 embryos; k, 51/52 embryos; n, 50/51 embryos), but rescued by *Meis3* co-expression (f, 29/33 embryos; i, 10/29 embryos; l, 22/39 embryos; o, 11/38 embryos). (C) In situ hybridization of late gastrula-early neurula siblings of embryos in A. All embryos are viewed dorsally, and oriented with anterior at the top, posterior at the bottom. The *Meis3* injected side is on the right (bright pink X-Gal staining). Dashed lines and bars are as in A. Panels c', f', i', embryos treated as in c, f, i, respectively, but with no  $\beta$ -gal. *Otx2* expression undergoes robust posterior expansion in *Dkk1* embryos (b, 49/51 embryos), which is inhibited by *Meis3* co-expression (c,c', 48/64 embryos). Expression of the posterior neural markers *HoxD1* and *Gbx2* is inhibited in *Dkk1* embryos (e, 53/53 embryos; h, 51/53 embryos), but is strongly rescued by *Meis3* co-expression (f,f', 58/72 embryos; i,i', 41/64 embryos). (D) Morphology of mid-late neurula embryos injected at the one-cell stage with either *Wnt3a*-MO (b, 70 ng), or *Meis3* mRNA (c, 0.7 ng), or both (d). Neural folding and convergence extension is inhibited in *Wnt3a* morphants (b, 60/64 embryos); *Meis3* co-expression rescued this phenotype (d, 48/49 embryos).

l,l'). Lineage tracing studies suggested that cells are not migrating across the mid-line (Fig. 2A,C). Thus, this observation is consistent with previously demonstrated *Meis3* non-cell autonomous activity

that induces primary neuron fate (Aamar and Frank, 2004). However, for most genes, expression rescue was restricted to the *Meis3*-injected side.

The *Wnt3a*-MO is a more specific tool than the *Dkk1* protein, because it exclusively inhibits *Wnt3a* protein translation. The *Wnt3a*-MO efficiently inhibits posterior neural marker expression (Fig. 2B). In one-cell-stage embryos injected separately with the *Wnt3a*-MO and *Meis3* RNA, there was a significant rescue of *Krox20*, *HoxB3*, *N-Tub* and *FoxD3* expression (Fig. 2B).

In late-gastrula stages, reducing *Meis3* protein expression levels by either *Wnt* loss of function, or the *Meis3*-MO also strongly inhibited expression of early homeobox genes such as *HoxD1*, *Gbx2* and *HoxA2* (Fig. 2C; see also Fig. S2 in the supplementary material). At these early stages, *HoxD1* and *Gbx2* expression are robustly rescued by *Meis3* (Fig. 2C); early *Otx2* expression is expanded by *Dkk1* and strongly inhibited by *Meis3* (Fig. 2C).

In *Dkk1*-injected neurula stage embryos, the anterior markers *XAG1*, *XANF1* and *Otx2* were typically expanded (Fig. 2A, parts b,e; data not shown); ectopic *Meis3* expression antagonized their expression. Note the striking posterior expansion of *XANF1* and *XAG1* in *Dkk1*-injected embryos, and the strong inhibition by *Meis3* co-expression (Fig. 2A, parts c,c',f; compare the bars on either side). When using cement gland size as an index of AP levels in the embryo, cement glands were typically 50-60% larger in *Dkk1*-expressing embryos versus controls; in embryos injected solely with *Meis3*, cement glands were 30% smaller versus controls, yet in *Meis3/Dkk1* co-injected embryos, cement glands were less than 5% larger than controls (not shown). Similar results were seen in embryos injected with the *Wnt3a*-MO (Fig. 2B). The *XANF1* marker is expanded in *Wnt3a*-morphant embryos and *Meis3* co-expression completely inhibits its expression (Fig. 2B, compare part b with c).

Another typical phenotype associated with a loss of posterior neural cell fates is the inhibition of neural plate folding and convergence extension (CE). Similar to *Meis3* morphants (Gutkovich et al., 2010), in *Wnt3a* morphants, neural folding and CE is perturbed (Fig. 2D, compare part b with part a). Exogenous *Meis3* significantly rescues this phenotype: embryos undergo normal neural folding and CE (Fig. 2D, compare part b with part d).

To confirm that *Meis3* is downstream of *Wnt3a*, we expressed *Wnt3a* in the *Meis3*-morphant background (Dibner et al., 2001). Ectopic *Wnt3a* expression never rescued the *Meis3*-morphant phenotype (Fig. 3A). In gastrula and neurula stage AC explants, co-expression of the BMP dominant-negative receptor protein and the *Wnt3* plasmid induces optimal *Meis3* expression levels (not shown), as well as a wide array of posterior neural markers (Fig. 3B,C). These explants likely mimic the in vivo embryonic state, in which both neuralizing and caudalizing pathways act in concert to specify cell fates along the AP axis. The early activation of posterior specifying *Hox* and *FGF* gene expression is blocked in these *Meis3*-morphant explants (Fig. 3B), as is the subsequent high activation of *Krox20*, *HoxB4*, *N-Tub*, *NeuroD*, *FoxD3* and *slug* expression (Fig. 3C). In complementary experiments, identical results were observed when *Meis3*-morphant AC explants were alternatively neuralized/caudalized by *noggin/Wnt3a* mRNA co-injection (not shown). Thus, in sensitized explants, as in embryos, the activation of posterior neural markers by canonical *Wnt* signaling requires *Meis3* protein.

These results show that *Meis3* is a downstream mediator of *Wnt* caudalizing activity in *Xenopus* embryos. *Wnt3a* protein appears to be the crucial *Wnt* ligand, as in its absence, *Meis3* expression is highly inhibited and posterior neural cell fates are compromised. However, in the whole embryo, it is difficult to pinpoint the exact regional and temporal function of the *Wnt3a* protein in neural caudalization.

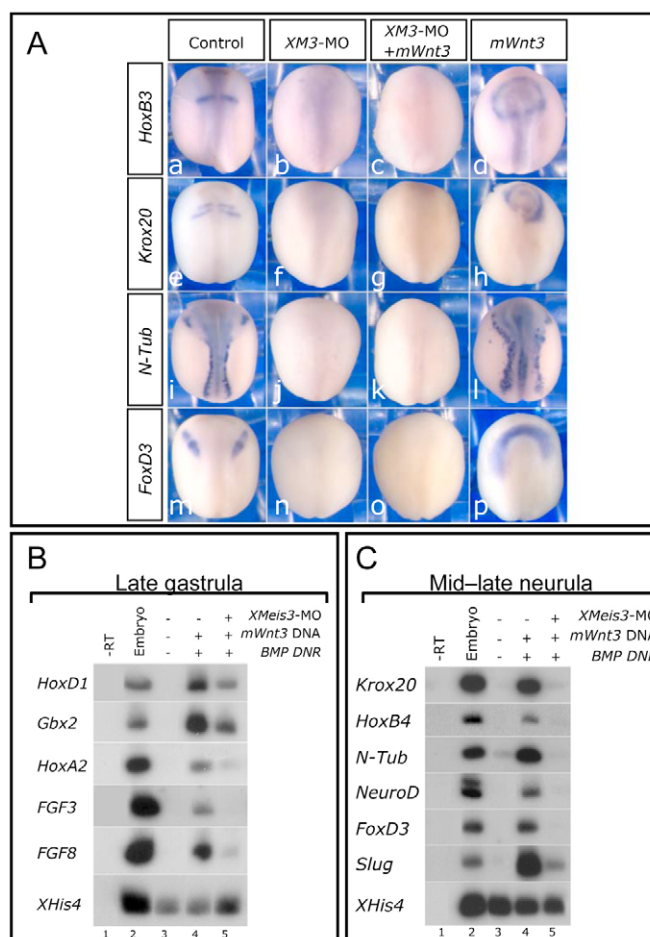

**Fig. 3. Wnt signaling cannot caudalize in the absence of *Meis3* protein activity.** (A) In situ hybridization of mid-late neurula embryos injected separately at the one-cell stage with either *Meis3* MO (20 ng; b,f,j,n), or *mWnt3* DNA (70 pg; d,h,l,p), or both (c,g,k,o). Posterior neural marker expression of *HoxB3*, *Krox20*, *N-Tub* and *FoxD3* is highly inhibited in *Meis3* morphants (b, 25/25 embryos; f, 40/40 embryos; j, 36/36 embryos; n, 16/16 embryos). *mWnt3* co-expression did not rescue the expression of these markers (c, 40/41 embryos; g, 71/75 embryos; k, 63/63 embryos; o, 29/29 embryos). Ectopic *mWnt3a* levels alone expand posterior marker expression (d, 20/20 embryos; h, 48/49 embryos; l, 33/36 embryos; p, 18/18 embryos). (B) sqRT-PCR of pools of 18 mid-late gastrula AC explants dissected from embryos injected at the one-cell stage with *mWnt3* DNA (200 pg) and *BMP DNR* mRNA (100 pg), and/or separately with *Meis3* MO (33 ng) ( $n=5$  experiments). (C) sqRT-PCR of pools of 18 mid-late neurula AC explants from siblings of embryos in B ( $n=5$  experiments).

### The dorsolateral paraxial mesoderm is crucial for *Meis3* expression and subsequent posterior specification

*Wnt3a* is only detected in the neural plate at early neurula stages, but posterior neural plate induction occurs at earlier mid-gastrula stages, when *Meis3* expression in the presumptive neural plate precedes detectable *Wnt3a* expression in this region (Y.M.E. and D.F., unpublished). However, prior to expression in the neural plate, *Wnt3a* mRNA is detected in the dorsolateral paraxial mesoderm regions of gastrula stage *Xenopus* and zebrafish embryos (McGrew et al., 1997; Shimizu et al., 2005; Faas and Isaacs, 2009); this *Wnt3a* expression phase precedes *Meis3*

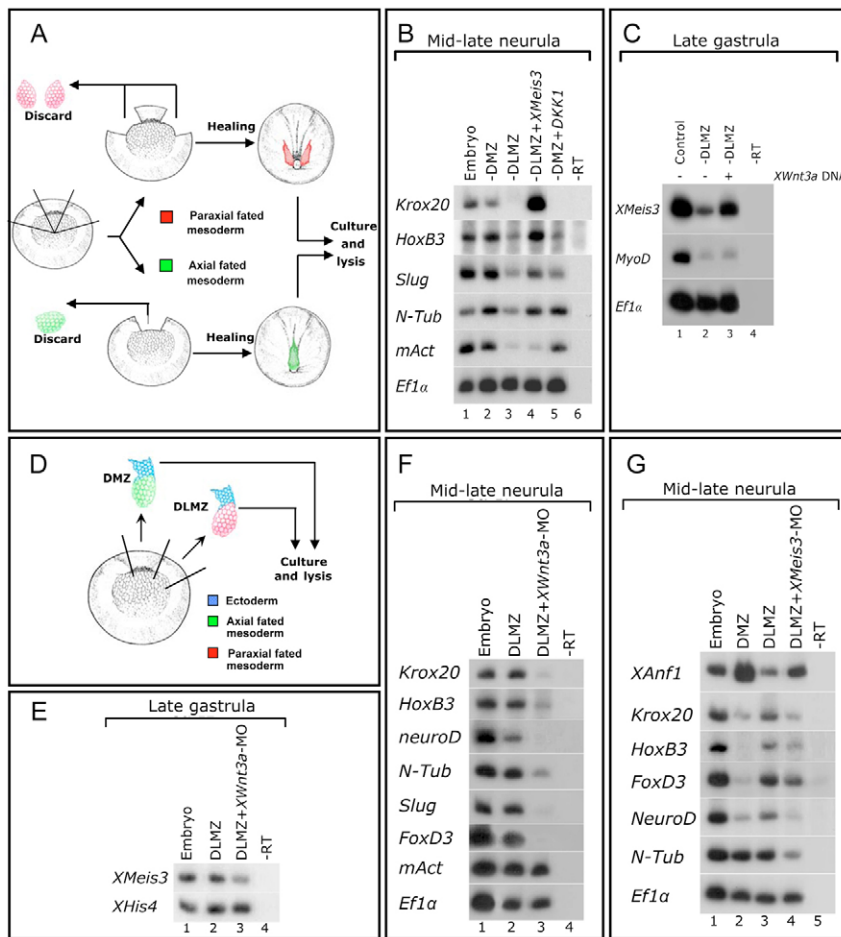

**Fig. 4. Paraxial-fated DLMZ mesoderm caudalizes neuroectoderm by inducing *Meis3* expression in a *Wnt3a*-dependant manner.** (A) The DLMZ ablation assay. In early-gastrula stage 10.25 embryos, either the two DLMZ regions (red) or the one DMZ region (green) of approximately 60° radius were removed. Embryos were cultured to gastrula and neurula stages. (B) sqRT-PCR of pools of nine mid-late neurula DLMZ- or DMZ-ablated embryos, either uninjected, or injected at the one-cell stage with either *Meis3* (0.75 ng) or *Dkk1* (50 pg) mRNAs. *mAct* expression controls for accurate ablation of DLMZ regions ( $n=5$  experiments). (C) sqRT-PCR of pools of nine late-gastrula, DLMZ-ablated embryos, either uninjected, or injected at the one-cell stage with *mWnt3* DNA (50 pg). *MyoD* expression controls for accurate ablation of DLMZ regions and the lack of mesoderm induction by *mWnt3* ( $n=4$  experiments). (D) The 'dirty' DLMZ explant assay. In gastrula stage 10.25 embryos, DLMZ (red) and DMZ (green) regions of approximately 60° radius juxtaposed to adjacent ectoderm (blue) were removed. Explants were cultured to gastrula and neurula stages. (E) sqRT-PCR of pools of nine mid-late gastrula 'dirty' DLMZ explants dissected from embryos either uninjected, or marginally injected into two blastomeres at the two-cell stage with *Wnt3a*-MO (20 ng per blastomere) ( $n=4$  experiments). (F) sqRT-PCR of pools of nine mid-late neurula 'dirty' DLMZ explants from siblings of embryos shown in E. *mAct* expression controls for the lack of mesoderm perturbation by the *Wnt3a*-MO ( $n=5$  experiments). (G) sqRT-PCR of pools of 12-18 mid-late neurula (stage 17) 'dirty' DMZ and DLMZ explants dissected from embryos either uninjected, or injected at the one-cell stage with *Meis3*-MO (20 ng;  $n=4$  experiments).

expression. Our previous studies showed that gastrula-stage DLMZ regions are required for neural crest induction, but not for general neural induction in embryos; by contrast, embryos ablated for the dorsal marginal zone (DMZ) induce neural crest normally (Bonstein et al., 1998). Gastrula-stage DLMZ explants also efficiently induce neural crest in juxtaposed AC explants (Bonstein et al., 1998). Because of its location adjacent to the neuroectoderm, the DLMZ could also be a more generic inducer of posterior neural cell fates. In this case, a non-neural source of *Wnt3a* protein expressed in the DLMZ region could be secreted to overlying neural ectoderm, where it would caudalize the tissue by inducing *Meis3* expression.

To address this possibility, we cultured embryos to early gastrula stages and dissected out both DLMZs; in a parallel control group, the single DMZ was removed (Fig. 4A). Embryos were cultured to late gastrula or mid-late neurula stages for analysis. DLMZ ablation but not DMZ ablation led to a loss of posterior fates, including hindbrain (*Krox20*, *HoxB3*) and primary neurons (*N-Tub*), as well as neural crest (*slug*; Fig. 4B). *Meis3* expression was also highly reduced in DLMZ-ablated embryos (Fig. 4C). As a control for dissection accuracy, *mAct* expression was compared in DLMZ- and DMZ-ablated embryos (Fig. 4B). To determine whether *Meis3* protein suffices for neural caudalization in this assay, embryos destined for DLMZ ablation were injected with ectopic *Meis3* mRNA at the one-cell stage (Fig. 4B). In *Meis3*-injected/DLMZ-ablated embryos, there was a striking recovery of all of the lost posterior neural cell fate markers (Fig. 4B); this was independent of mesoderm, as *mAct* expression was not rescued in these embryos

(Fig. 4B). Furthermore, ectopic *Wnt3a* DNA expression rescued *Meis3* expression in these DLMZ-depleted embryos (Fig. 4C); again this was independent of paraxial mesoderm formation, as *MyoD* expression was not rescued in these embryos (Fig. 4C). These results show that the DLMZ is required in the embryo to induce generic posterior neural cell fates, and that *Wnt3a* or *Meis3* can replace the DLMZ in this process. In embryos lacking DMZs, posterior neural markers are expressed at fairly normal levels (Fig. 4B). Supporting the observations in DLMZ-depleted embryos, the induction of posterior neural markers in DMZ-depleted embryos is a canonical Wnt-dependent process, as ectopic *Dkk1* levels eliminated their expression (Fig. 4B).

### Wnt3a expression in the dorsolateral mesoderm induces posterior-neural cell fates via *Meis3*

Because the DLMZ is crucial for *Meis3* expression and neural caudalization, we examined its posterior-neural induction potential. Early-gastrula stage DLMZ explants were removed, in which a flap of juxtaposed cells from the ectodermal region remained attached to the mesoderm. This is an analogous DLMZ version of a Keller DMZ explant, allowing us to examine tissue interactions between the mesoderm and ectoderm ex vivo (Fig. 4D). We call these 'dirty' DLMZ explants, because they deliberately contain this residual ectodermal tissue, as opposed to the standard pristine DLMZs, which are predominantly mesodermal in origin. *Meis3* expression was induced (Fig. 4E) and posterior neural marker expression was robust in 'dirty' DLMZ versus 'dirty' DMZ explants (Fig. 4F-G). DMZ explants did not express high levels of *Meis3* mRNA (not



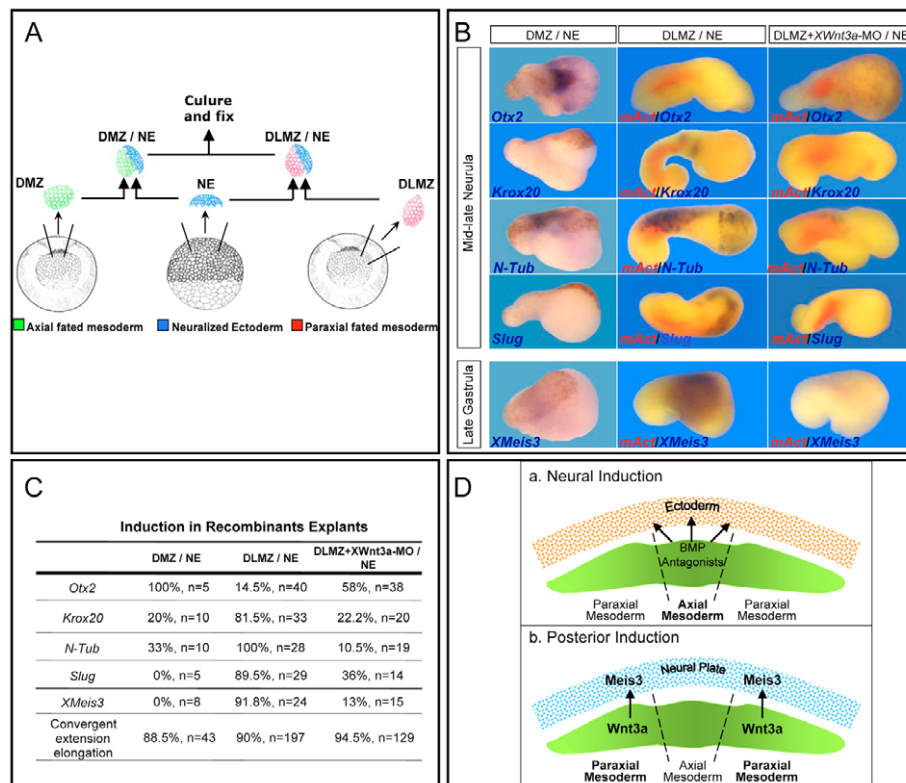

**Fig. 5. Wnt3a expression in paraxial-fated mesoderm is required to induce *Meis3* expression and posterior-neural cell fates.** (A) The recombinant DLMZ/neuroectoderm explant assay. In gastrula stage 10.25 embryos, DLMZ (red) and DMZ (green) regions of approximately 60° radius are juxtaposed to AC ectoderm (NE, blue) removed from blastula stage 8-9 embryos injected with 100 pg *BMP DNR* mRNA. Recombinant explants are cultured to gastrula and neurula stages. (B) Double in situ hybridization of bleached DLMZ/NE explants recombined from uninjected or *Wnt3a*-MO injected (20 ng) DLMZs. High levels of *Krox20*, *N-Tub*, *Slug* and *Meis3* are induced in DLMZ/NE recombinants, with repression of *Otx2* expression (purple, center) and typical *mAct* expression (red). In *Wnt3a*-morphant DLMZ/NE recombinants, *Otx2* expression is recovered and *Krox20*, *N-Tub*, *Slug* and *Meis3* expression is not detected (purple, right), whereas *mAct* expression is normal (red). DMZ/NE explants were recombined from pigmented DMZ and albino NE (left). *Otx2* is highly expressed in DMZ/NE recombinants; posterior markers are not detected (purple, left). (C) Summary of the results in B. All scored DLMZ/NE recombinant explants express *mAct* normally. (D) Model: Wnt3a from the paraxial-fated DLMZ region induces *Meis3* expression and posterior cell fates in the neural plate. (a) Neural induction by axial mesoderm. (b) Posterior neural induction by paraxial mesoderm.

shown). In *Wnt3a*-morphant ‘dirty’ DLMZ explants, posterior neural marker expression was inhibited (Fig. 4F), including early *Meis3* expression (Fig. 4E). In *Meis3*-morphant ‘dirty’ DLMZ explants, there was a strong inhibition of all of the posterior neural markers (including early *HoxD1* expression; data not shown), with a subsequent increase in the anterior markers *Otx2* (not shown) and *XANF1* (Fig. 4G), suggesting that the loss of *Meis3* expression in the explant prevents its caudalization and drives it to a more anterior neural fate. Mesoderm formation as assayed by *mAct* expression was normal in the *Meis3*- (data not shown) and *Wnt3a*-morphant explants (Fig. 4F).

To fully pinpoint the site of embryonic *Wnt3a* activity, recombinant explant assays were performed in which DLMZ explants were recombined with AC explants neuralized (NE) using a BMP dominant-negative receptor (Fig. 5A). To lineage trace the cell sources in the explants, two parallel techniques were used. In some assays, we recombined pigmented mesodermal explants with albino NEs, using the albinism as a lineage trace for the NE tissue (Fig. 5B, DMZ/NE explant, far left panel). In other cases, we performed the same experiment on bleached pigmented explants; however, in these experiments, double in situ hybridization was performed for *m-Act* (red) and the neural marker (purple) of choice

in order to distinguish between the mesodermal and neural portions of the explant (Fig. 5B). In mid-late neurula-stage recombinant explants (Fig. 5B, center explant panels), the DLMZ induced the expression of hindbrain (*Krox20*), primary neuron (*N-Tub*) and neural crest (*slug*) markers. Expression of the anterior marker *Otx2* (expressed in the NE) was repressed by the DLMZ compared with the DMZ (Fig. 5B, compare left and center explant panels). In late-gastrula stage sibling explants, *Meis3* expression in the NE was strongly induced by the DLMZ (Fig. 5B, center explant panel). Typically, neural gene expression patterns in the recombinant explants strikingly recapitulate their spatial patterns in the embryo, a broad band for *Meis3*, thin stripes for *Krox20*, punctate dots/stripes for *N-Tub* and lateral bands for *slug* (Fig. 5B, compare explant expression patterns in the center panel to embryos in Fig. 2). *Meis3* and later posterior markers were not induced in the DMZ recombinant explants (Fig. 5B, compare left and center panels). To confirm that *Wnt3a* plays a key signaling role in the mesoderm, we recombined the *Wnt3a*-MO-injected DLMZs with NEs. In this case, the DLMZ failed to induce either early *Meis3* or later posterior neural marker expression in the NE portion of the recombinant explant (Fig. 5B, compare right and center explant panels); the anterior *Otx2* marker expression was not repressed. The statistics

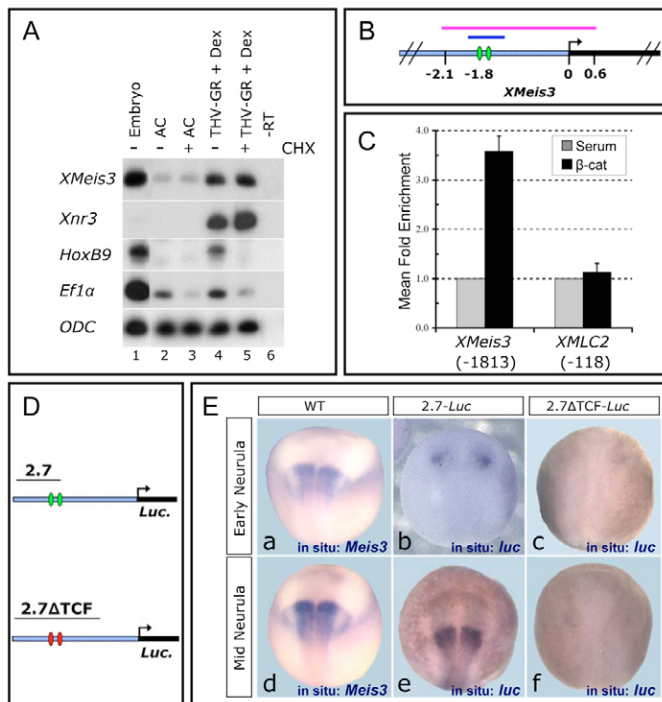

**Fig. 6. *Meis3* is a direct target of  $\beta$ -catenin.** (A) CHX AC assay (Materials and methods). sqRT-PCR of pools of 18 mid-late gastrula ACs were dissected from embryos injected with 20 pg *THVGR* mRNA at the one-cell stage. ACs were treated with CHX, DEX or CHX+DEX. *Ef1 $\alpha$*  expression serves as a positive control for CHX activity and *ODC* as a loading control ( $n=2$  experiments). (B) The *XMeis3* genomic locus. Green ovals indicate  $\beta$ -catenin/TCF-binding sites, the blue line indicates the ChIP enriched fragment detected in C; the pink line indicates the 2.7 kb used for the constructs in D and E. (C) ChIP for  $\beta$ -catenin in late-gastrula embryos. A region 1.8 kb upstream of the *Meis3* transcriptional start site is specifically enriched. Data are plotted as mean fold enrichment by  $\beta$ -catenin IP (black bars) over control serum IP (gray bars) for *Meis3* (-1813) or a negative control locus *XMLC2* (-118). Error bars show s.e.m. ( $n=3$ ). (D) Reporter constructs used in E. The 2.7-*luc* construct contains wild-type  $\beta$ -catenin/TCF-binding sites (green ovals), whereas these are mutated in the 2.7 $\Delta$ TCF-*luc* construct (red ovals). (E) *Meis3* promoter activity is dependent on two  $\beta$ -catenin/TCF-binding sites. In situ hybridization of early- and mid-neurula 2.7-*luc* (b,e) and 2.7 $\Delta$ TCF-*luc* (c, f) transgenic embryos, and of wild-type embryos (a,d).

describing recombinant explant results are summarized in Fig. 5C. The injected *Wnt3a*-MO concentrations did not perturb mesoderm formation in the embryo or in explants, as determined by *XBra* (Fig. 1D) and *mAct* gene expression (Fig. 4F, Fig. 5B). These results demonstrate that disruption of *Wnt3a* protein expression in late-gastrula stage dorsolateral mesoderm prevents *Meis3* expression in the early neural plate, thus triggering a loss of posterior cell fates in the developing nervous system.

### *Meis3* is a direct target of $\beta$ -catenin

Our data raised the possibility that *Meis3* might be a direct early target of Wnt signaling. To address this, we examined Wnt-dependent induction of *Meis3* transcription in the absence of protein synthesis. In AC explants expressing inducible TCF (THVGR), treatment with cycloheximide (CHX) prior to dexamethasone (DEX) induction still resulted in robust *Meis3* expression (Fig. 6A),

as with the positive control, *Xnr3*, a known direct target of Wnt. As a negative control, CHX-treatment inhibited THVGR induction of *HoxB9* expression (Fig. 6A).

To further investigate this regulation, we examined the *Meis3* gene promoter. We cloned a 6.5 kb *Meis3* gene fragment. This region contains a putative TATA-less promoter initiator-INR sequence (see Fig. S3 in the supplementary material), as mapped by the 5' RACE procedure (data not shown). Two putative  $\beta$ -catenin/TCF-binding sites were found in close proximity, 1.8 kb upstream of the start of *Meis3* gene transcription (Fig. 6B; see also Fig. S3 in the supplementary material). To confirm the  $\beta$ -catenin interaction, we performed ChIP analysis; this region was strongly bound by  $\beta$ -catenin protein in chromatin isolated from late-gastrula stage embryos (Fig. 6C), when *Meis3* expression is maximally activated in the embryo. Two similarly located putative  $\beta$ -catenin/TCF-binding sites were also detected in the *X. tropicalis* *Meis3* locus, in a region conserved between *X. laevis* and *X. tropicalis* (data not shown).

To complement the ChIP analysis, we generated transgenic frogs using a *Meis3* genomic fragment of 2.7 kb driving *luciferase* (*luc*) expression (see Materials and methods). This construct (2.7-*luc*) contains 2.1 kb of sequence upstream to the start of transcription and 0.6 kb of transcribed UTR sequence (Fig. 6B,D; see also Fig. S3 in the supplementary material). In early- to mid-neurula stage embryos, *luc* expression driven by the 2.7-*luc* construct strongly resembled the endogenous *Meis3* hindbrain expression domain (Fig. 6E; early-neurula: panel b, 22/98 embryos, compare with panel a; mid-neurula: panel e, 11/48 embryos, compare with panel d). To determine whether these two  $\beta$ -catenin/TCF sites bound in ChIP are required for *Meis3* promoter activity, we examined *luc* expression driven by the 2.7 $\Delta$ TCF-*luc* construct, in which both of these sites are mutated (Fig. 6D; see also Fig. S3 in the supplementary material). *luc* expression driven by the 2.7 $\Delta$ TCF construct was barely detected in early- to mid-neurula stage embryos (Fig. 6E; early-neurula: panel c, 3/155 embryos; mid-neurula: panel f, 3/46 embryos). Double mutation of both TCF sites was necessary to fully inhibit transgene expression; mutation of either TCF site did not significantly alter *luc* expression (not shown). Low *luc* expression in the mutant construct does not appear to result from poor transgenesis. First, the constructs are nearly identical, varying by only four nucleotide point mutations in each TCF-binding site. In any given experiment, transgenics with 2.7-*luc* or 2.7 $\Delta$ TCF-*luc* were made in the same fertilization batches, under the same experimental conditions. In addition, all transgenics expressed low background levels of *luc* in the epidermal ectoderm at the same frequency, regardless of whether it was the 2.7-*luc* or 2.7 $\Delta$ TCF-*luc* construct (data not shown). These results show that these  $\beta$ -catenin/TCF sites are obligatory for *Meis3* promoter activity.

### DISCUSSION

Many studies have shown a wide range of roles for neural caudalizing molecules such as FGF3/FGF8, RA and *Wnt3a* in inducing spinal cord, hindbrain, neural crest and primary neuron cell fates. Scant data is available connecting downstream transcription factors to these pathways. Many of these signaling pathway components are expressed simultaneously in multiple temporal and regional zones, with apparent overlap in their abilities to induce different cell fates. A major challenge has been to decipher which regionally distinct signaling ligands activate specific transcription factors that act downstream to specify embryonic cell fates. In this study, we have taken advantage of the *Xenopus* embryo to make these direct connections. We show that signals regulating posterior neural fates emanate from a specialized mesodermal region, the



DLMZ (see model in Fig. 5D). Careful examination of previous studies in *Xenopus* and our own work show that *Wnt3a* is indeed expressed in paraxial-fated DLMZ (McGrew et al., 1997). This specialized region is required for posterior neural fate induction. We have then shown that mesodermal *Wnt3a* directly induces expression of the transcription factor Meis3 in the overlying neural plate. Meis3 is necessary and sufficient for neural caudalization.

Using tissue specific ablations, tissue recombination and explant assays, we have clarified the requirements of mesodermal Wnt signaling for patterning the neural plate. In chick and zebrafish embryos, paraxial-fated mesoderm explants caudalize the neural plate, transforming forebrain to more posterior cell types (Muhr et al., 1997; Woo and Fraser, 1997). This endogenous chick caudalizing ligand was not identified, but neither FGF nor RA activity could replace paraxial tissue in caudalizing assays (Muhr et al., 1997; Muhr et al., 1999). In chick (like *Xenopus*), the addition of ectopic Wnt protein caudalized forebrain explants. Conversely, when soluble Wnt-blocking Frz8 receptor protein was added to caudal neural explants, posterior cell fates were lost (Nordstrom et al., 2002). However, these experiments did not distinguish between mesodermal and neural sources of the functional Wnt signal.

Studies in zebrafish morphants and mutants suggest that Wnt8 and Wnt3a might be functionally redundant; mesodermal sources of either molecule could act as a neural caudalizer. However, these embryos also suffered severe mesoderm perturbations (Erter et al., 2001; Lekven et al., 2001), so it is difficult to conclude whether neural patterning defects are specific, or the indirect result of losing paraxial mesoderm fates. In zebrafish, the *Wnt8*-MO consistently gave a stronger mesoderm perturbation phenotype than did the *Wnt3a*-MO, and co-injection of both gave a more severe additive phenotype, which included neural mis-patterning (Shimizu et al., 2005); thus the potential for two overlapping but non-identical roles for Wnt8 and Wnt3a in mesodermal and/or neural patterning cannot be ruled out.

In *Xenopus* and zebrafish, the disruption of Wnt8 activity perturbs mesoderm pattern: dorsal mesoderm is expanded and more ventrolateral regions, including the paraxial-fated mesoderm, are reduced (Christian and Moon, 1993; Hoppler et al., 1996; Hoppler and Moon, 1998; Lekven et al., 2001; Ramel and Lekven, 2004; Ramel et al., 2005). These observations are not seen for Wnt3a in this study. In Wnt3a-morphant embryos, the organizer is not expanded, ventrolateral markers are expressed normally and paraxial mesoderm forms muscle (Fig. 1D, Fig. 4F, Fig. 5B). Moreover, we show that the *Wnt3a*-MO blocks the induction of posterior neural cell fates without altering either *Wnt8* expression (Fig. 1D) or activity (see Fig. S1C in the supplementary material). The timing of expression in both *Xenopus* and zebrafish show that Wnt8 is detected before Wnt3a (Christian et al., 1991; Smith and Harland, 1991; Krauss et al., 1992; Kelly et al., 1995; McGrew et al., 1997; Shimizu et al., 2005), which suggests that Wnt8 patterns the mesoderm and that Wnt3a could act downstream to supplement this process by patterning neuroectoderm. We cannot completely rule out a role for Wnt3a in mesoderm patterning. Yet under our experimental conditions, we show that Wnt3a knockdown does not alter mesoderm, but severely perturbs posterior neural cell fates, showing that Wnt3a is the crucial DLMZ ligand required for neural patterning.

We have identified a required direct target of Wnt signaling in the neuroectoderm. Previous studies had suggested Wnt signaling acts as a caudalizing morphogen to activate homeobox gene expression in the *Xenopus* hindbrain (Kiecker and Niehrs, 2001). Furthermore, in chick explants, paraxial mesoderm induced homeobox gene

expression in anterior neural ectoderm (Itasaki et al., 1996; Grapin-Botton et al., 1997). Our data demonstrate that *Wnt3a* directly controls *Meis3* expression; in turn, Meis3 protein regulates proper homeobox gene expression levels, thus mediating Wnt morphogenetic activity to induce posterior cell fates. Meis3 protein could optimally activate early homeobox gene expression by simultaneously cooperating with other signaling pathways. For example, *HoxD1* is a Meis3 direct target gene that is also a direct target of RA (Dibner et al., 2004) and canonical Wnt signaling (Y.M.E. and D.F., unpublished) pathways. In *Xenopus*, Gbx2 homeobox protein is required for neural crest induction; Gbx2 is also a direct target of canonical Wnt signaling (Li et al., 2009). No doubt, there is much cross-talk between Meis3 protein and the various caudalizing pathways, as well as with other early transcription factors. These interactions likely ensure the optimal temporal and spatial pattern of early homeobox gene expression in the developing neural plate.

It has recently been proposed that a highly conserved Wnt-Cdx-Hox gene hierarchy acts to pattern the most posterior/tail regions in developing bilaterian embryos (Martin and Kimelman, 2009). Possibly, the activation of more anteriorly expressed Hox genes is dependent on a similar Wnt-Meis-Hox hierarchy. Interestingly, *cdx* and *Meis3* loss-of-function embryos share mirror image-like phenotypes (Isaacs et al., 1998; Dibner et al., 2004; Skromne et al., 2007; Faas and Isaacs, 2009). Cdx protein deficiency causes spinal cord defects (Isaacs et al., 1998; Skromne et al., 2007; Faas and Isaacs, 2009), whereas Meis3 knockdown causes severe hindbrain perturbations, without significantly disrupting spinal cord formation (Dibner et al., 2004).

Is canonical Wnt activation of *Meis* gene expression a conserved phenomenon? In *C. elegans*, the PSA-3/Meis protein is required for daughter cell fates after asymmetric cell division, and it is a direct target of the Wnt pathway (Arata et al., 2006). POP-1/TCF protein binds the *psa-3/Meis* promoter and its binding site is required for expression. In *Drosophila*, the wingless (Wg/Wnt) protein activates expression of the sole Meis protein homolog, the *homothorax* (*hth*) gene, which is required for wing hinge development (Casares and Mann, 2000). In both beetles and spiders, *hth* expression seems to be regulated by Wg during appendage development (Prpic et al., 2003). Thus, in diverged invertebrate systems, Wnt signaling controls *Meis/hth* family gene expression. This study shows the first evidence for Wnt regulation of *Meis* gene expression in vertebrates.

The canonical Wnt, FGF and RA signaling pathways are required for posterior CNS formation in *Xenopus* (Blumberg et al., 1997; Franco et al., 1999; Hardcastle et al., 2000; Villanueva et al., 2002; Shiotsugu et al., 2004; Monsoro-Burq et al., 2005; Wu et al., 2005). In a unifying model, we suggest that Wnt3a signaling from the DLMZ triggers *Meis3* expression in the overlying neural plate (Fig. 5D). Meis3 protein directly activates *FGF3* and *FGF8* gene expression (Aamar and Frank, 2004; Gutkovich et al., 2010), and Meis3 protein cannot induce posterior cell fates in the absence of downstream FGF signaling (Ribisi et al., 2000; Aamar and Frank, 2004). Supporting these data, in caudalized *Xenopus* explants, FGF acts downstream of canonical Wnt signaling (Domingos et al., 2001). We show that *FGF3* and *FGF8* expression in Wnt-caudalized explants is dependent on Meis3 protein activity (Fig. 3B). RA signaling also interacts with Meis3 protein to optimize Hox gene expression in the early neural plate to fine-tune the hindbrain pattern (Dibner et al., 2004). Thus, in a regulatory network controlling posterior neural cell fates, Meis3 acts downstream to canonical Wnt, upstream to FGF, and in concert with RA signaling to activate gene expression.

What is the organizer's role in neural patterning? Clearly the DMZ is indispensable for neural induction, which is a prerequisite for neural patterning. In explants, BMP antagonism does not induce *Meis3* expression but, in combination with Wnt signaling, BMP antagonism optimally induces *Meis3* expression. BMP antagonism induces competent neuroectoderm that is responsive to caudalizing signals from the DLMZ. Optimal *Meis3* expression in the embryo depends on *Zic1* protein activity (Gutkovich et al., 2010), and *Zic* gene family expression requires BMP antagonism. While the organizer does not caudalize neuroectoderm, it provides the competence for the Wnt pathway to activate *Meis3* gene transcription (Fig. 5D).

There are still many open questions. In the presumptive hindbrain region of gastrula embryos, *Meis3*-expressing cells act as a hindbrain-inducing center by inducing posterior neural cell fates non-cell autonomously (Aamar and Frank, 2004). At gastrula stages, when this center is active, the target cells are clustered in close proximity. How does *Meis3* induce different cell fates in such proximal, but distinct, embryonic regions? How are the different posterior neural cell types, such as hindbrain, primary neuron and neural crest specified to such exact regions by similar signaling pathways and transcription factors during overlapping time windows? Our future challenge is to determine how *Meis3* protein acts with these signaling pathways and other transcription factors to generate multiple nervous system cell fates.

#### Acknowledgements

D.F. was supported by grants from the Israel Science Foundation (197/05, 658/09).

#### Competing interests statement

The authors declare no competing financial interests.

#### Supplementary material

Supplementary material for this article is available at <http://dev.biologists.org/lookup/suppl/doi:10.1242/dev.044750/-DC1>

#### References

- Aamar, E. and Frank, D. (2004). *Xenopus* *Meis3* protein forms a hindbrain-inducing center by activating FGF/MAP kinase and PCP pathways. *Development* **131**, 153-163.
- Arata, Y., Kouike, H., Zhang, Y., Herman, M. A., Okano, H. and Sawa, H. (2006). Wnt signaling and a Hox protein cooperatively regulate *psa-3/Meis* to determine daughter cell fate after asymmetric cell division in *C. elegans*. *Dev. Cell* **11**, 105-115.
- Blumberg, B., Bolado, J., Jr, Moreno, T. A., Kintner, C., Evans, R. M. and Papalopulu, N. (1997). An essential role for retinoid signaling in anteroposterior neural patterning. *Development* **124**, 373-379.
- Blythe, S. A., Reid, C. D., Kessler, D. S. and Klein, P. S. (2009). Chromatin immunoprecipitation in early *Xenopus laevis* embryos. *Dev. Dyn.* **238**, 1422-1432.
- Bonstein, L., Elias, S. and Frank, D. (1998). Paraxial-fated mesoderm is required for neural crest induction in *Xenopus* embryos. *Dev. Biol.* **193**, 156-168.
- Casares, F. and Mann, R. S. (2000). A dual role for homothorax in inhibiting wing blade development and specifying proximal wing identities in *Drosophila*. *Development* **127**, 1499-1508.
- Christian, J. L. and Moon, R. T. (1993). Interactions between *Xwnt-8* and Spemann organizer signaling pathways generate dorsoventral pattern in the embryonic mesoderm of *Xenopus*. *Genes Dev.* **7**, 13-28.
- Christian, J. L., McMahon, J. A., McMahon, A. P. and Moon, R. T. (1991). *Xwnt-8*, a *Xenopus* Wnt-1/int-1-related gene responsive to mesoderm-inducing growth factors, may play a role in ventral mesodermal patterning during embryogenesis. *Development* **111**, 1045-1055.
- Cox, W. G. and Hemmati-Brivanlou, A. (1995). Caudalization of neural fate by tissue recombination and bFGF. *Development* **121**, 4349-4358.
- Dibner, C., Elias, S. and Frank, D. (2001). *XMeis3* protein activity is required for proper hindbrain patterning in *Xenopus laevis* embryos. *Development* **128**, 3415-3426.
- Dibner, C., Elias, S., Ofir, R., Souopgui, J., Kolm, P. J., Sive, H., Pieler, T. and Frank, D. (2004). The *Meis3* protein and retinoid signaling interact to pattern the *Xenopus* hindbrain. *Dev. Biol.* **271**, 75-86.
- Domingos, P. M., Itasaki, N., Jones, C. M., Mercurio, S., Sargent, M. G., Smith, J. C. and Krumlauf, R. (2001). The Wnt/beta-catenin pathway posteriorizes neural tissue in *Xenopus* by an indirect mechanism requiring FGF signalling. *Dev. Biol.* **239**, 148-160.
- Durst, A. J., Timmermans, J. P., Hage, W. J., Hendriks, H. F., de Vries, N. J., Heideveld, M. and Nieuwkoop, P. D. (1989). Retinoic acid causes an anteroposterior transformation in the developing central nervous system. *Nature* **340**, 140-144.
- Erter, C. E., Wilm, T. P., Basler, N., Wright, C. V. and Solnica-Krezel, L. (2001). Wnt8 is required in lateral mesodermal precursors for neural posteriorization in vivo. *Development* **128**, 3571-3583.
- Faas, L. and Isaacs, H. V. (2009). Overlapping functions of *Cdx1*, *Cdx2*, and *Cdx4* in the development of the amphibian *Xenopus tropicalis*. *Dev. Dyn.* **238**, 835-852.
- Fletcher, R. B., Baker, J. C. and Harland, R. M. (2006). FGF8 spliceforms mediate early mesoderm and posterior neural tissue formation in *Xenopus*. *Development* **133**, 1703-1714.
- Franco, P. G., Paganelli, A. R., Lopez, S. L. and Carrasco, A. E. (1999). Functional association of retinoic acid and hedgehog signaling in *Xenopus* primary neurogenesis. *Development* **126**, 4257-4265.
- Glinka, A., Wu, W., Delius, H., Monaghan, A. P., Blumenstock, C. and Niehrs, C. (1998). *Dickkopf-1* is a member of a new family of secreted proteins and functions in head induction. *Nature* **391**, 357-362.
- Grapin-Botton, A., Bonnin, M. A. and Le Douarin, N. M. (1997). Hox gene induction in the neural tube depends on three parameters: competence, signal supply and paralogue group. *Development* **124**, 849-859.
- Gutkovich, Y. E., Ofir, R., Elkouby, Y. M., Dibner, C., Gefen, A., Elias, S. and Frank, D. (2010). *Xenopus* *Meis3* protein lies at a nexus downstream to *Zic1* and *Pax3* proteins, regulating multiple cell-fates during early nervous system development. *Dev. Biol.* **338**, 50-62.
- Hardcastle, Z., Chalmers, A. D. and Papalopulu, N. (2000). FGF-8 stimulates neuronal differentiation through FGFR-4a and interferes with mesoderm induction in *Xenopus* embryos. *Curr. Biol.* **10**, 1511-1514.
- Harland, R. M. (1991). In situ hybridization: an improved whole-mount method for *Xenopus* embryos. *Methods Cell Biol.* **36**, 685-695.
- Holowacz, T. and Sokol, S. (1999). FGF is required for posterior neural patterning but not for neural induction. *Dev. Biol.* **205**, 296-308.
- Hoppler, S. and Moon, R. T. (1998). BMP-2/4 and Wnt-8 cooperatively pattern the *Xenopus* mesoderm. *Mech. Dev.* **71**, 119-129.
- Hoppler, S., Brown, J. D. and Moon, R. T. (1996). Expression of a dominant-negative Wnt blocks induction of *MyoD* in *Xenopus* embryos. *Genes Dev.* **10**, 2805-2817.
- Isaacs, H. V., Pownall, M. E. and Slack, J. M. (1998). Regulation of Hox gene expression and posterior development by the *Xenopus* caudal homologue *Xcad3*. *EMBO J.* **17**, 3413-3427.
- Itasaki, N., Sharpe, J., Morrison, A. and Krumlauf, R. (1996). Reprogramming Hox expression in the vertebrate hindbrain: influence of paraxial mesoderm and rhombomere transposition. *Neuron* **16**, 487-500.
- Kazanskaya, O., Glinka, A. and Niehrs, C. (2000). The role of *Xenopus* *dickkopf1* in prechordal plate specification and neural patterning. *Development* **127**, 4981-4992.
- Kelly, G. M., Greenstein, P., Erezilmaz, D. F. and Moon, R. T. (1995). Zebrafish *wnt8* and *wnt8b* share a common activity but are involved in distinct developmental pathways. *Development* **121**, 1787-1799.
- Keren, A., Bengal, E. and Frank, D. (2005). p38 MAP kinase regulates the expression of *XMyf5* and affects distinct myogenic programs during *Xenopus* development. *Dev. Biol.* **288**, 73-86.
- Kiecker, C. and Niehrs, C. (2001). A morphogen gradient of Wnt/beta-catenin signalling regulates anteroposterior neural patterning in *Xenopus*. *Development* **128**, 4189-4201.
- Krauss, S., Korzh, V., Fjose, A. and Johansen, T. (1992). Expression of four zebrafish *wnt*-related genes during embryogenesis. *Development* **116**, 249-259.
- Lamb, T. M. and Harland, R. M. (1995). Fibroblast growth factor is a direct neural inducer, which combined with noggin generates anterior-posterior neural pattern. *Development* **121**, 3627-3636.
- Lekven, A. C., Thorpe, C. J., Waxman, J. S. and Moon, R. T. (2001). Zebrafish *wnt8* encodes two *wnt8* proteins on a bicistronic transcript and is required for mesoderm and neuroectoderm patterning. *Dev. Cell* **1**, 103-114.
- Li, B., Kuriyama, S., Moreno, M. and Mayor, R. (2009). The posteriorizing gene *Gbx2* is a direct target of Wnt signalling and the earliest factor in neural crest induction. *Development* **136**, 3267-3278.
- Martin, B. L. and Kimelman, D. (2009). Wnt signaling and the evolution of embryonic posterior development. *Curr. Biol.* **19**, R215-R219.
- McGrew, L. L., Lai, C. J. and Moon, R. T. (1995). Specification of the anteroposterior neural axis through synergistic interaction of the Wnt signaling cascade with noggin and follistatin. *Dev. Biol.* **172**, 337-342.
- McGrew, L. L., Hoppler, S. and Moon, R. T. (1997). Wnt and FGF pathways cooperatively pattern anteroposterior neural ectoderm in *Xenopus*. *Mech. Dev.* **69**, 105-114.

- Monsoro-Burq, A. H., Wang, E. and Harland, R.** (2005). Msx1 and Pax3 cooperate to mediate FGF8 and WNT signals during *Xenopus* neural crest induction. *Dev. Cell* **8**, 167-178.
- Muhr, J., Jessell, T. M. and Edlund, T.** (1997). Assignment of early caudal identity to neural plate cells by a signal from caudal paraxial mesoderm. *Neuron* **19**, 487-502.
- Muhr, J., Graziano, E., Wilson, S., Jessell, T. M. and Edlund, T.** (1999). Convergent inductive signals specify midbrain, hindbrain, and spinal cord identity in gastrula stage chick embryos. *Neuron* **23**, 689-702.
- Nordstrom, U., Jessell, T. M. and Edlund, T.** (2002). Progressive induction of caudal neural character by graded Wnt signaling. *Nat. Neurosci.* **5**, 525-532.
- Papalopulu, N. and Kintner, C.** (1996). A posteriorising factor, retinoic acid, reveals that anteroposterior patterning controls the timing of neuronal differentiation in *Xenopus* neuroectoderm. *Development* **122**, 3409-3418.
- Prpic, N. M., Janssen, R., Wigand, B., Klingler, M. and Damen, W. G.** (2003). Gene expression in spider appendages reveals reversal of *exd/hth* spatial specificity, altered leg gap gene dynamics, and suggests divergent distal morphogen signaling. *Dev. Biol.* **264**, 119-140.
- Ramel, M. C. and Lekven, A. C.** (2004). Repression of the vertebrate organizer by Wnt8 is mediated by Vent and Vox. *Development* **131**, 3991-4000.
- Ramel, M. C., Buckles, G. R., Baker, K. D. and Lekven, A. C.** (2005). WNT8 and BMP2B co-regulate non-axial mesoderm patterning during zebrafish gastrulation. *Dev. Biol.* **287**, 237-248.
- Re'em-Kalma, Y., Lamb, T. and Frank, D.** (1995). Competition between noggin and bone morphogenetic protein 4 activities may regulate dorsalization during *Xenopus* development. *Proc. Natl. Acad. Sci. USA* **92**, 12141-12145.
- Ribisi, S., Jr, Mariani, F. V., Aamar, E., Lamb, T. M., Frank, D. and Harland, R. M.** (2000). Ras-mediated FGF signaling is required for the formation of posterior but not anterior neural tissue in *Xenopus laevis*. *Dev. Biol.* **227**, 183-196.
- Rogers, C. D., Archer, T. C., Cunningham, D. D., Grammer, T. C. and Casey, E. M.** (2008). Sox3 expression is maintained by FGF signaling and restricted to the neural plate by Vent proteins in the *Xenopus* embryo. *Dev. Biol.* **313**, 307-319.
- Salzberg, A., Elias, S., Nachaliel, N., Bonstein, L., Henig, C. and Frank, D.** (1999). A Meis family protein caudalizes neural cell fates in *Xenopus*. *Mech. Dev.* **80**, 3-13.
- Sharpe, C. R.** (1991). Retinoic acid can mimic endogenous signals involved in transformation of the *Xenopus* nervous system. *Neuron* **7**, 239-247.
- Shimizu, T., Bae, Y. K., Muraoka, O. and Hibi, M.** (2005). Interaction of Wnt and caudal-related genes in zebrafish posterior body formation. *Dev. Biol.* **279**, 125-141.
- Shiotsugu, J., Katsuyama, Y., Arima, K., Baxter, A., Koide, T., Song, J., Chandraratna, R. A. and Blumberg, B.** (2004). Multiple points of interaction between retinoic acid and FGF signaling during embryonic axis formation. *Development* **131**, 2653-2667.
- Sive, H. L., Draper, B. W., Harland, R. M. and Weintraub, H.** (1990). Identification of a retinoic acid-sensitive period during primary axis formation in *Xenopus laevis*. *Genes Dev.* **4**, 932-942.
- Skromne, I., Thorsen, D., Hale, M., Prince, V. E. and Ho, R. K.** (2007). Repression of the hindbrain developmental program by Cdx factors is required for the specification of the vertebrate spinal cord. *Development* **134**, 2147-2158.
- Smith, W. C. and Harland, R. M.** (1991). Injected Xwnt-8 RNA acts early in *Xenopus* embryos to promote formation of a vegetal dorsalizing center. *Cell* **67**, 753-765.
- Snir, M., Ofir, R., Elias, S. and Frank, D.** (2006). *Xenopus laevis* POU91 protein, an Oct3/4 homologue, regulates competence transitions from mesoderm to neural cell fates. *EMBO J.* **25**, 3664-3674.
- Villanueva, S., Glavic, A., Ruiz, P. and Mayor, R.** (2002). Posteriorization by FGF, Wnt, and retinoic acid is required for neural crest induction. *Dev. Biol.* **241**, 289-301.
- Vlachakis, N., Choe, S. K. and Sagerstrom, C. G.** (2001). Meis3 synergizes with Pbx4 and Hoxb1b in promoting hindbrain fates in the zebrafish. *Development* **128**, 1299-1312.
- Waskiewicz, A. J., Rikhof, H. A., Hernandez, R. E. and Moens, C. B.** (2001). Zebrafish Meis functions to stabilize Pbx proteins and regulate hindbrain patterning. *Development* **128**, 4139-4151.
- Woo, K. and Fraser, S. E.** (1997). Specification of the zebrafish nervous system by nonaxial signals. *Science* **277**, 254-257.
- Wu, J., Yang, J. and Klein, P. S.** (2005). Neural crest induction by the canonical Wnt pathway can be dissociated from anterior-posterior neural patterning in *Xenopus*. *Dev. Biol.* **279**, 220-232.
